# Supplementary material for: Process of landfill leachate pretreatment using coagulation and hydrodynamic cavitation oxidation
Source: Royal Society of Chemistry journal article supplement (doi:10.1039/d3ra04259f), 2023-01-01
Supplement: d3ra04259f1.pdf [file d3ra04259f1.pdf]

## Supporting Information

### Process of landfill leachate pretreatment using coagulation and hydrodynamic cavitation oxidation

Yina Qiao<sup>a,†,\*</sup>, Riya jin<sup>a,†</sup>, Jingshuai Gao<sup>a,\*</sup>, Kun Wang<sup>a</sup>, Jian Xiong<sup>b</sup>, MengYe Jia<sup>a</sup>, Yu Jiang<sup>a</sup>, Zengdi He<sup>a</sup>, Jiaoqin Liu<sup>a</sup>,

<sup>a</sup> *School of Environment and Safety Engineering, North University of China, Shanxi Taiyuan 030051, P.R. China*

<sup>b</sup> *Key Laboratory of Biodiversity and Eco-environmental Protection of the Qinghai-Tibetan Plateau (Ministry of Education), School of Ecology and Environment, Tibet University, Tibet Lhasa 850000, P.R. China*

\* Corresponding author.

E-mail address: qiaoyina@nuc.edu.cn (Y. Qiao); 15735055606@163.com (J. Gao).

† These authors contributed equally to this work and should be considered co-first authors.

Total Pages: 3

Texts: 1

Table: 1

## Text S1

The calculation of COD value by the following equation:

$$COD_{Cr} = (V_0 - V_1) \times C \times 8 \times 1000 / V$$

where,  $C$  is the ammonium iron(II) sulfate (FAS) standard solution concentration (mol/L);  $V_0$  is the volume of FAS standard solution used when titrating the blank solution (mL);  $V_1$  is the volume of FAS standard solution used when titrating the water sample (mL);  $V$  is the water sample volume (mL); 8 is the molar mass of oxygen ( $\frac{1}{2}O$ ) (g/mol).

**Table S1.** The components and functions of the HC device

| device composition | Model and manufacturer                                                                                            | Function                                                                                                                                                                                                            |
|--------------------|-------------------------------------------------------------------------------------------------------------------|---------------------------------------------------------------------------------------------------------------------------------------------------------------------------------------------------------------------|
| Booster pump       | Stainless steel multistage centrifugal<br>pump power: 2.2 kW model: CDLF-100<br>(Shanghai Yuquan Pump Co., Ltd.). | Provides energy for plant operation,<br>transports wastewater and brings inlet<br>pressure to desired value.                                                                                                        |
| Water tank         | PVC, dimensions 500 mm 500 mm 300<br>mm, thickness: 5 mm, capacity:75 L.                                          | Holds the wastewater solution.                                                                                                                                                                                      |
| Condensing tube    | Rubber hose                                                                                                       | Adjust solution temperature to keep<br>temperature constant.                                                                                                                                                        |
| Propeller mixer    | Custom built                                                                                                      | Solution mixing.                                                                                                                                                                                                    |
| Valves             | Stainless steel, DN40 ball valves                                                                                 | Valve 1 is the main valve, which is opened<br>before the booster pump opens. Valves 2,3<br>and 4 jointly control the inlet and outlet<br>pressure of the HC generator and keep the<br>equipment running constantly. |
| Pipeline           | The main pipeline is made of stainless<br>steel. The side piping is made of PVC and<br>the pipe diameter is DN40. | Constitutes a closed loop, the solution<br>circulates in the cavitation vessel to be<br>degraded and the stainless steel material<br>avoids damage to the pipe due to<br>cavitation in the cavitation process.      |
| Flow meter         | Model: LWSY-25, measuring range 1-10<br>m <sup>3</sup> h <sup>-1</sup> (Dongtai Dongxing Instrument<br>Factory)   | Determines the liquid flow of the main<br>line.                                                                                                                                                                     |
| Pressure gauge     | Model: BD-801 K, Range 0-1.0 Mpa<br>(Shanghai Kaixun Technology Co., Ltd.)                                        | Determines the pressure before and after<br>HC.                                                                                                                                                                     |
